# Supplementary material
Source: PubMed Central journal article supplement (PMC3707993)

## **Appendix 1:** Search terms and screening algorithms (as supplied by the authors)

### Full list of search terms

cognitive loss / impairment / decline / deficit / degeneration / deterioration / performance / process / function / activity  
memory loss / impairment / decline / deficit / degeneration / deterioration / performance / process / function / activity  
mental impairment / decline / deficit / degeneration / deterioration  
cerebral impairment / decline / deficit / degeneration / deterioration  
preservation of cognition / memory  
Alzheimer\*  
dementia  
mild cognitive impairment / disorder  
aricept  
cholinesterase inhibitors  
ChEI  
donepezil  
exelon  
galantamine  
memantine  
namenda  
reminyl  
rivastigmine  
memory activities / challenges / games / enhancement / improvement  
cognitive challenges / games / enhancement / improvement  
cerebral challenges / games / enhancement / improvement  
brain challenges / games / enhancement / improvement  
benign senescent forgetfulness  
brain impairment / decline / deficit / degeneration / deterioration

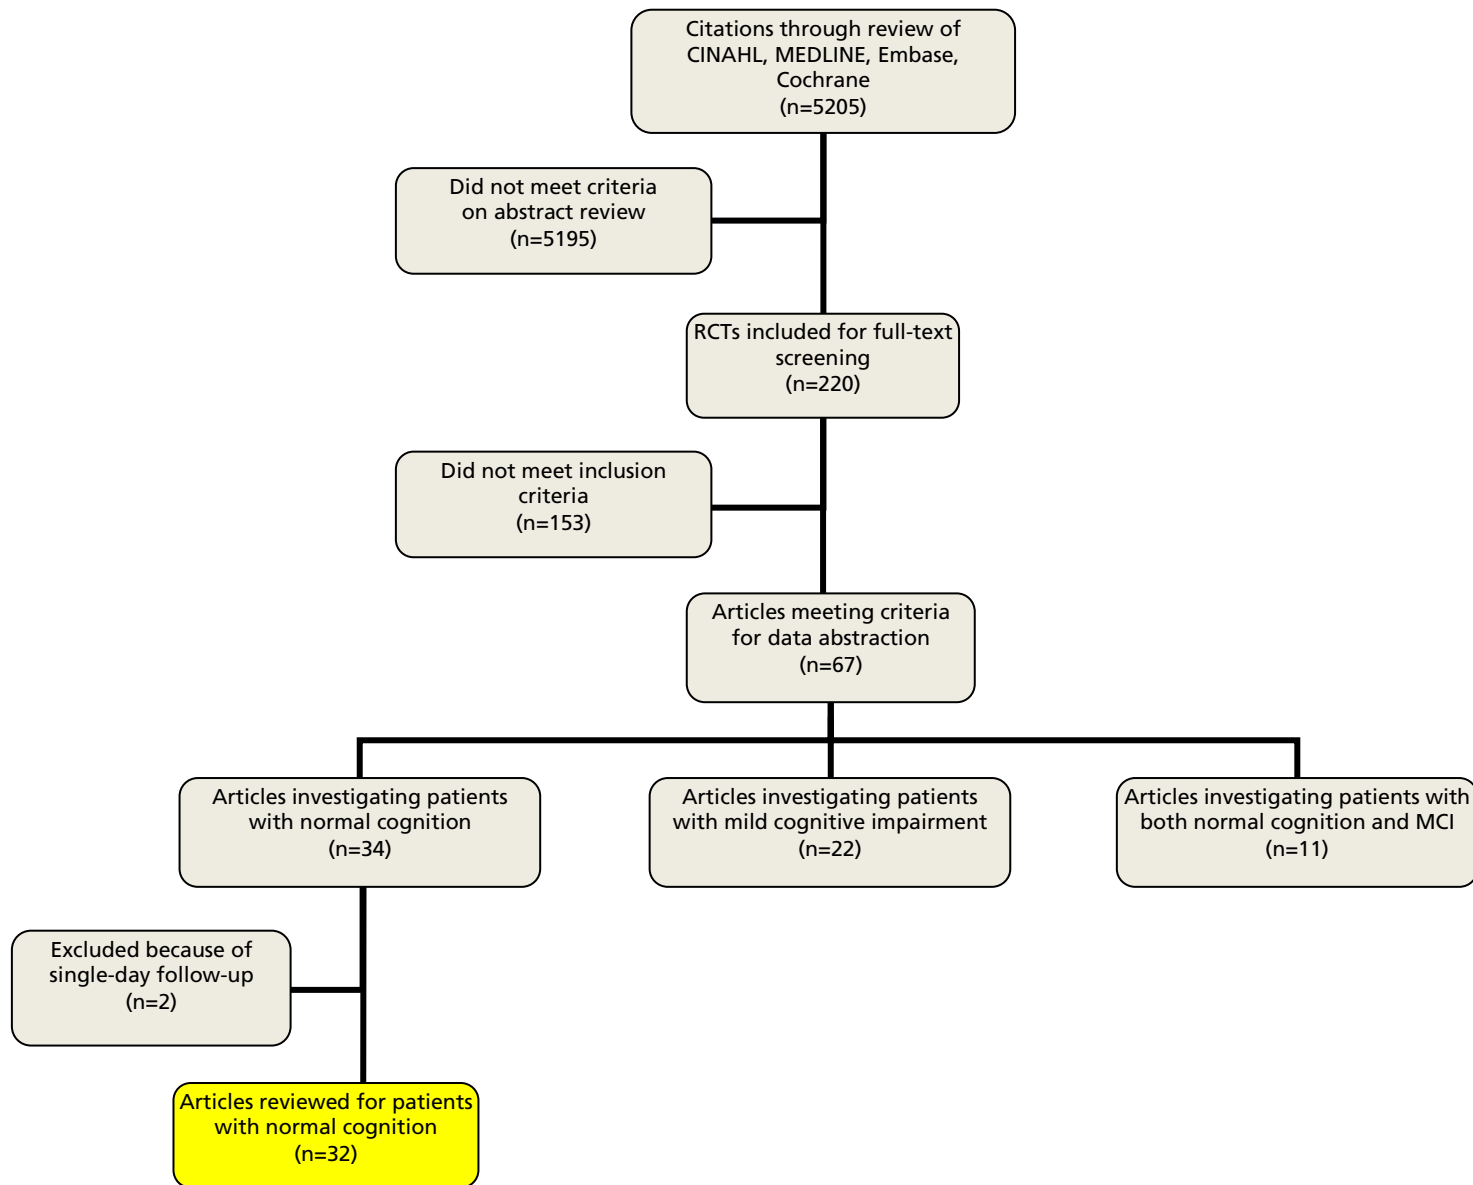

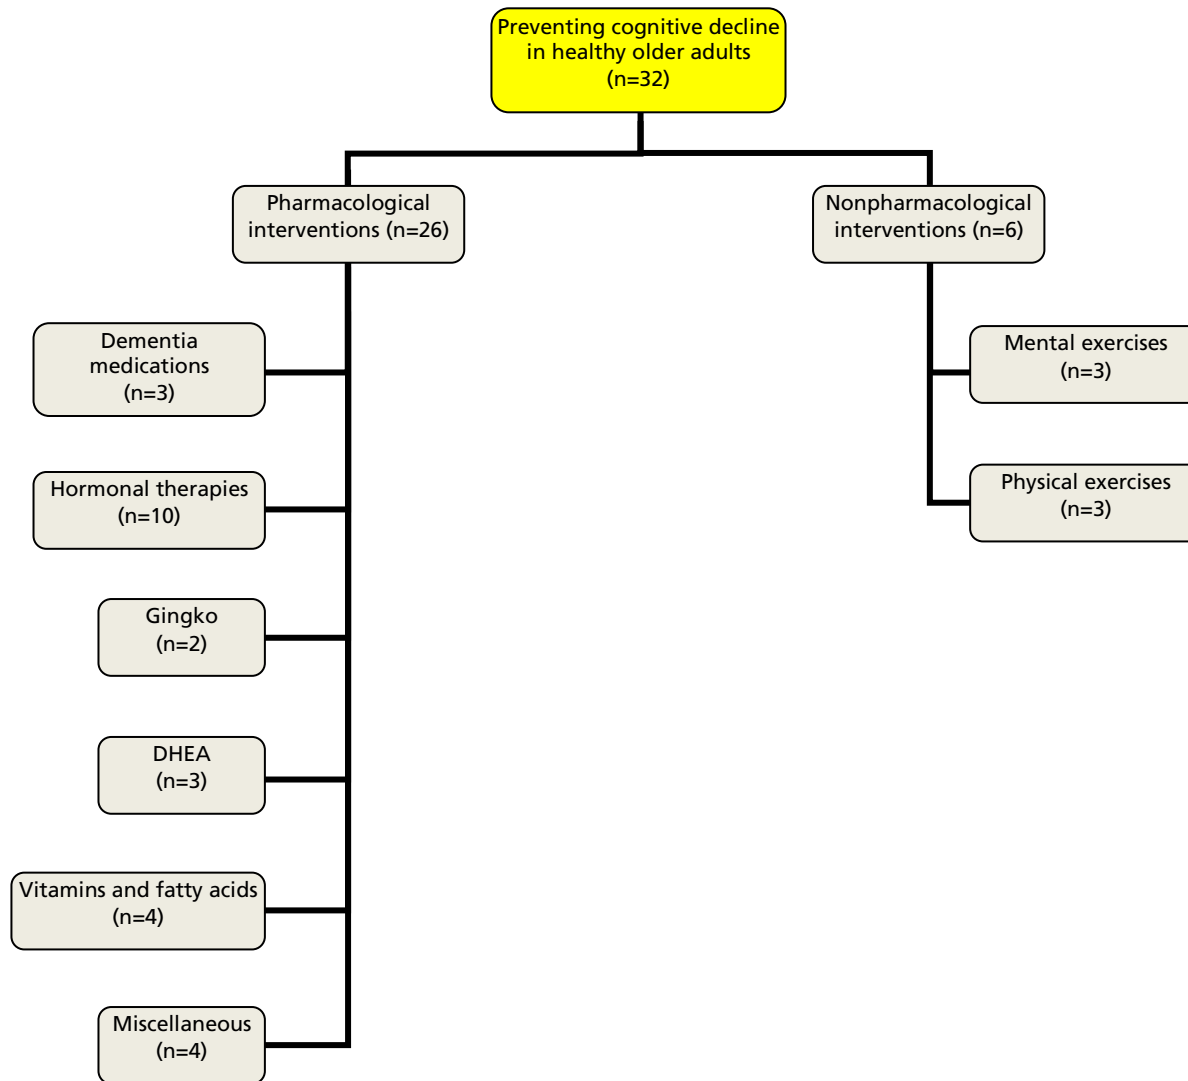

Supplement: supp_121448_prevent-naqvi-1-at.pdf [file supp_121448_prevent-naqvi-1-at.pdf]
