# Supplementary material
Source: PubMed Central journal article supplement (PMC3707993)
Supplement: supp_121448_prevent-naqvi-2-at.pdf [file supp_121448_prevent-naqvi-2-at.pdf]

**Appendix 2: Assessment of risk of bias and study quality\* (as supplied by the authors)**

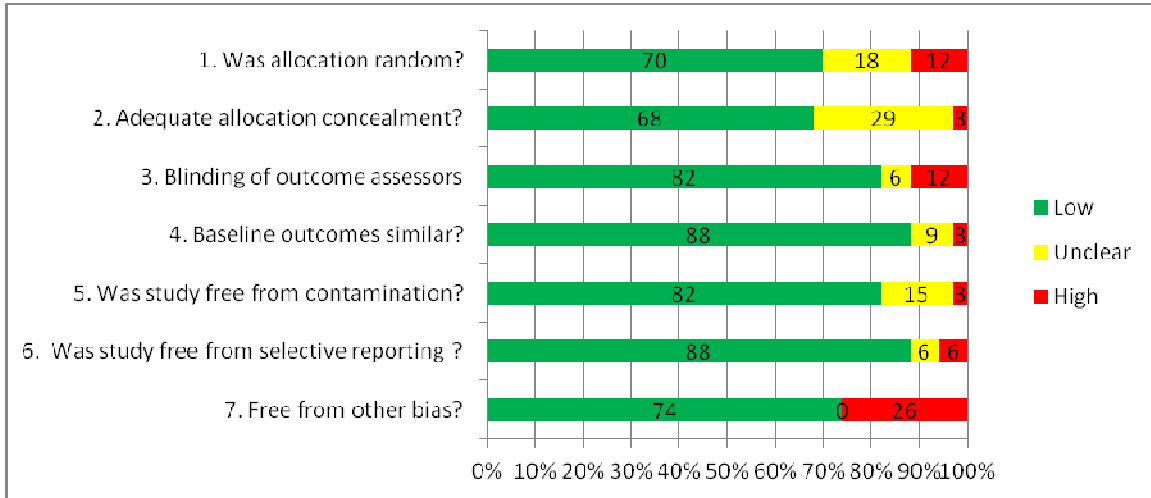

\*Study quality was assessed using the criteria developed by the Cochrane Effective Practice and Organization of Care (EPoC) risk-of-bias tool (<http://epoc.cochrane.org/epoc-methods>).
